# Supplementary material for: Narrative-based computational modelling of the Gp130/JAK/STAT signalling pathway
Source: PubMed Central journal article supplement (PMC2678071; doi:10.1186/1752-0509-3-40), 2009-04-15
Supplement: 1752-0509-3-40-S1.pdf [file 1752-0509-3-40-S1.pdf]

| id | name                | size                   | unit of measure | dimensions |
|----|---------------------|------------------------|-----------------|------------|
| 1  | <b>exosol</b>       | $9.91 \times 10^{-12}$ | L               | 3          |
| 2  | <b>cellMembrane</b> | $1.26 \times 10^{-7}$  | dm <sup>2</sup> | 2          |
| 3  | <b>cytosol</b>      | $2.09 \times 10^{-12}$ | L               | 3          |
| 4  | <b>nucleus</b>      | $0.25 \times 10^{-12}$ | L               | 3          |
