# Supplementary material for: Narrative-based computational modelling of the Gp130/JAK/STAT signalling pathway
Source: PubMed Central journal article supplement (PMC2678071; doi:10.1186/1752-0509-3-40), 2009-04-15
Supplement: 1752-0509-3-40-S2.pdf [file 1752-0509-3-40-S2.pdf]

| name  | descr     | site   | site_state     | site_act     | state        | state_act    | comp | comp_act    | init_amount | rel  |
|-------|-----------|--------|----------------|--------------|--------------|--------------|------|-------------|-------------|------|
| LIF   | ligand    |        |                |              | <b>bound</b> | <b>false</b> | 1    | <b>true</b> | 3000        | 100% |
| OSM   | ligand    |        |                |              | <b>bound</b> | <b>false</b> | 1    | <b>true</b> | 3000        | 100% |
| gp130 | receptor  | LIF    | <b>bound</b>   | <b>false</b> | <b>bound</b> | <b>false</b> | 2    | <b>true</b> | 1000        | 50%  |
|       |           | OSM    | <b>bound</b>   | <b>false</b> |              |              |      |             |             |      |
|       |           | Y767   | <b>phospho</b> | <b>false</b> |              |              |      |             |             |      |
|       |           | Y814   | <b>phospho</b> | <b>false</b> |              |              |      |             |             |      |
|       |           | Y905   | <b>phospho</b> | <b>false</b> |              |              |      |             |             |      |
|       |           | Y915   | <b>phospho</b> | <b>false</b> |              |              |      |             |             |      |
|       |           | SOCS3  | <b>bound</b>   | <b>false</b> |              |              |      |             |             |      |
|       |           | typeI  | <b>dimer</b>   | <b>false</b> |              |              |      |             |             |      |
|       |           | typeII | <b>dimer</b>   | <b>false</b> |              |              |      |             |             |      |
| LIFR  | receptor  | LIF    | <b>bound</b>   | <b>false</b> | <b>bound</b> | <b>false</b> | 2    | <b>true</b> | 1000        | 50%  |
|       |           | OSM    | <b>bound</b>   | <b>false</b> |              |              |      |             |             |      |
|       |           | Y981   | <b>phospho</b> | <b>false</b> |              |              |      |             |             |      |
|       |           | Y1001  | <b>phospho</b> | <b>false</b> |              |              |      |             |             |      |
|       |           | Y1028  | <b>phospho</b> | <b>false</b> |              |              |      |             |             |      |
|       |           | SOCS3  | <b>bound</b>   | <b>false</b> |              |              |      |             |             |      |
| OSMR  | receptor  | OSM    | <b>bound</b>   | <b>false</b> | <b>bound</b> | <b>false</b> | 2    | <b>true</b> | 1000        | 50%  |
|       |           | Y917   | <b>phospho</b> | <b>false</b> |              |              |      |             |             |      |
|       |           | Y945   | <b>phospho</b> | <b>false</b> |              |              |      |             |             |      |
|       |           | SOCS3  | <b>bound</b>   | <b>false</b> |              |              |      |             |             |      |
| STAT3 | effector  | Y705   | <b>phospho</b> | <b>false</b> | <b>dimer</b> | <b>false</b> | 3    | <b>true</b> | 3000        | 30%  |
|       |           | gp130  | <b>bound</b>   | <b>false</b> |              |              |      |             |             |      |
|       |           | LIFR   | <b>bound</b>   | <b>false</b> |              |              |      |             |             |      |
|       |           | OSMR   | <b>bound</b>   | <b>false</b> |              |              |      |             |             |      |
|       |           | PIAS3  | <b>bound</b>   | <b>false</b> |              |              |      |             |             |      |
| SOCS3 | inhibitor |        |                |              | <b>bound</b> | <b>false</b> | 3    | <b>true</b> | 0           | 100% |
| PIAS3 | inhibitor |        |                |              | <b>bound</b> | <b>false</b> | 4    | <b>true</b> | 1000        | 20%  |
