# Supplementary material for: Narrative-based computational modelling of the Gp130/JAK/STAT signalling pathway
Source: PubMed Central journal article supplement (PMC2678071; doi:10.1186/1752-0509-3-40), 2009-04-15
Supplement: 1752-0509-3-40-S3.pdf [file 1752-0509-3-40-S3.pdf]

| id | type                      | rate                 | unit             | rel | react_vol             | unit | rel |
|----|---------------------------|----------------------|------------------|-----|-----------------------|------|-----|
| 1  | <b>binding</b>            | $4.8 \times 10^7$    | $M^{-1}Min^{-1}$ | 80% | $9.91 \cdot 10^{-12}$ | 1    | 50% |
| 2  | <b>unbinding</b>          | $3.6 \times 10^{-1}$ | $Min^{-1}$       | 80% | $9.91 \cdot 10^{-12}$ | 1    | 50% |
| 3  | <b>binding</b>            | $4.8 \times 10^7$    | $M^{-1}Min^{-1}$ | 80% | $9.91 \cdot 10^{-12}$ | 1    | 50% |
| 4  | <b>unbinding</b>          | $3.6 \times 10^{-2}$ | $Min^{-1}$       | 80% | $9.91 \cdot 10^{-12}$ | 1    | 50% |
| 5  | <b>binding</b>            | $4.8 \times 10^7$    | $M^{-1}Min^{-1}$ | 80% | $9.91 \cdot 10^{-12}$ | 1    | 50% |
| 6  | <b>unbinding</b>          | $3.6 \times 10^{-2}$ | $Min^{-1}$       | 80% | $9.91 \cdot 10^{-12}$ | 1    | 50% |
| 7  | <b>binding</b>            | $4.8 \times 10^7$    | $M^{-1}Min^{-1}$ | 80% | $9.91 \cdot 10^{-12}$ | 1    | 50% |
| 8  | <b>unbinding</b>          | $3.6 \times 10^{-1}$ | $Min^{-1}$       | 80% | $9.91 \cdot 10^{-12}$ | 1    | 50% |
| 9  | <b>binding</b>            | $4.8 \times 10^7$    | $M^{-1}Min^{-1}$ | 80% | $9.91 \cdot 10^{-12}$ | 1    | 50% |
| 10 | <b>unbinding</b>          | $3.6 \times 10^{-2}$ | $Min^{-1}$       | 80% | $9.91 \cdot 10^{-12}$ | 1    | 50% |
| 11 | <b>dimerization</b>       | <b>inf</b>           | $M^{-1}Min^{-1}$ | 50% | $9.91 \cdot 10^{-12}$ | 1    | 50% |
| 12 | <b>dedimerization</b>     | 0                    | $M^{-1}Min^{-1}$ | 0%  | $9.91 \cdot 10^{-12}$ | 1    | 50% |
| 13 | <b>phosphorylation</b>    | 0.2                  | $Min^{-1}$       | 80% | $9.91 \cdot 10^{-12}$ | 1    | 50% |
| 14 | <b>dephosphorylation</b>  | 0                    | $Min^{-1}$       | 0%  | $9.91 \cdot 10^{-12}$ | 1    | 50% |
| 15 | <b>binding</b>            | $4.8 \times 10^8$    | $M^{-1}Min^{-1}$ | 20% | $2.09 \cdot 10^{-12}$ | 1    | 50% |
| 16 | <b>unbinding</b>          | 0.06                 | $Min^{-1}$       | 30% | $2.09 \cdot 10^{-12}$ | 1    | 50% |
| 17 | <b>phosphorylation</b>    | 0.2                  | $Min^{-1}$       | 80% | $2.09 \cdot 10^{-12}$ | 1    | 50% |
| 18 | <b>dephosphorylation</b>  | 0                    | $Min^{-1}$       | 0%  | $2.09 \cdot 10^{-12}$ | 1    | 50% |
| 19 | <b>unbinding</b>          | <b>inf</b>           | $Min^{-1}$       | 10% | $2.09 \cdot 10^{-12}$ | 1    | 50% |
| 20 | <b>homodimerization</b>   | <b>inf</b>           | $Min^{-1}$       | 50% | $2.09 \cdot 10^{-12}$ | 1    | 50% |
| 21 | <b>relocation</b>         | 1                    | $Min(t_{1/2})$   | 10% | $2.09 \cdot 10^{-12}$ | 1    | 50% |
| 22 | <b>dephosphorylation</b>  | 0.04                 | $Min^{-1}$       | 20% | $0.25 \cdot 10^{-12}$ | 1    | 50% |
| 23 | <b>dehomodimerization</b> | <b>inf</b>           | $Min^{-1}$       | 20% | $0.25 \cdot 10^{-12}$ | 1    | 50% |
| 24 | <b>relocation</b>         | 15                   | $Min(t_{1/2})$   | 10% | $0.25 \cdot 10^{-12}$ | 1    | 50% |
| 25 | <b>synthesis</b>          | 0.01                 | $Min^{-1}$       | 50% | $0.25 \cdot 10^{-12}$ | 1    | 50% |
| 26 | <b>binding</b>            | $6.0 \times 10^7$    | $M^{-1}Min^{-1}$ | 20% | $2.09 \cdot 10^{-12}$ | 1    | 50% |
| 27 | <b>unbinding</b>          | 0.006                | $Min^{-1}$       | 30% | $2.09 \cdot 10^{-12}$ | 1    | 50% |
| 28 | <b>binding</b>            | $1.0 \times 10^8$    | $M^{-1}Min^{-1}$ | 20% | $0.25 \cdot 10^{-12}$ | 1    | 50% |
| 29 | <b>unbinding</b>          | 0.06                 | $Min^{-1}$       | 30% | $0.25 \cdot 10^{-12}$ | 1    | 50% |
| 30 | <b>degradation</b>        | 0.01                 | $Min^{-1}$       | 50% | $0.25 \cdot 10^{-12}$ | 1    | 50% |
