# Supplementary material for: Narrative-based computational modelling of the Gp130/JAK/STAT signalling pathway
Source: PubMed Central journal article supplement (PMC2678071; doi:10.1186/1752-0509-3-40), 2009-04-15
Supplement: 1752-0509-3-40-S4.pdf [file 1752-0509-3-40-S4.pdf]

| id                | description                                                                                                                                                          | react | alt |
|-------------------|----------------------------------------------------------------------------------------------------------------------------------------------------------------------|-------|-----|
| LIF-gp130 binding |                                                                                                                                                                      |       |     |
| 1                 | <b>if gp130.LIF is not bound and LIF is not bound and gp130.typeI is not dimer and gp130.typeII is not dimer then LIF binds gp130 on LIF</b>                         | 1     |     |
| 2                 | <b>if gp130.LIF is bound and LIF is bound and gp130.typeI is not dimer and gp130.typeII is not dimer and gp130.Y767 is not phospho then LIF unbinds gp130 on LIF</b> | 2     |     |
| LIF-LIFR binding  |                                                                                                                                                                      |       |     |
| 3                 | <b>if LIFR.LIF is not bound and LIF is not bound and LIFR is not dimer then LIF binds LIFR on LIF</b>                                                                | 3     |     |
| 4                 | <b>if LIFR.LIF is bound and LIF is bound and LIFR is not dimer and LIFR.Y981 is not phospho then LIF unbinds LIFR on LIF</b>                                         | 4     |     |
| OSM-gp130 binding |                                                                                                                                                                      |       |     |
| 5                 | <b>if gp130.OSM is not bound and OSM is not bound and gp130.typeI is not dimer and gp130.typeII is not dimer then OSM binds gp130 on OSM</b>                         | 5     | 1   |
| 6                 | <b>if gp130.OSM is bound and OSM is bound and gp130.typeI is not dimer and gp130.typeII is not dimer and gp130.Y767 is not phospho then OSM unbinds gp130 on OSM</b> | 6     |     |
| OSM-LIFR binding  |                                                                                                                                                                      |       |     |
| 7                 | <b>if LIFR.OSM is not bound and OSM is not bound and LIFR is not dimer then OSM binds LIFR on OSM</b>                                                                | 7     | 3   |
| 8                 | <b>if LIFR.OSM is bound and OSM is bound and LIFR is not dimer and LIFR.Y981 is not phospho then OSM unbinds LIFR on OSM</b>                                         | 8     |     |
| OSM-OSMR binding  |                                                                                                                                                                      |       |     |
| 9                 | <b>if OSMR.OSM is not bound and OSM is not bound and OSMR is not dimer then OSM binds OSMR on OSM</b>                                                                | 9     |     |
| 10                | <b>if OSMR.OSM is bound and OSM is bound and OSMR is not dimer and OSMR.Y917 is not phospho then OSM unbinds OSMR on OSM</b>                                         | 10    |     |
