# Supplementary material for: Narrative-based computational modelling of the Gp130/JAK/STAT signalling pathway
Source: PubMed Central journal article supplement (PMC2678071; doi:10.1186/1752-0509-3-40), 2009-04-15
Supplement: 1752-0509-3-40-S5.pdf [file 1752-0509-3-40-S5.pdf]

| id                                        | description                                                                                                                                                                                                                                                                                | react | alt |
|-------------------------------------------|--------------------------------------------------------------------------------------------------------------------------------------------------------------------------------------------------------------------------------------------------------------------------------------------|-------|-----|
| LIF pathway → type I receptor gp130:LIFR  |                                                                                                                                                                                                                                                                                            |       |     |
| 11                                        | <b>if gp130.LIF is bound and LIFR.LIF is not bound and gp130.OSM is not bound and LIFR.OSM is not bound and LIFR is not dimer and gp130.typeI is not dimer and gp130.typeII is not dimer then LIFR dimerizes with gp130 on typeI</b>                                                       | 11    | 2   |
| 12                                        | <b>if gp130.LIF is bound and LIFR.LIF is not bound and gp130.OSM is not bound and LIFR.OSM is not bound and LIFR is dimer and gp130.typeI is dimer and gp130.typeII is not dimer and LIFR.Y981 is not phospho and gp130.Y767 is not phospho then LIFR dedimerizes from gp130 on typeI</b>  | 12    |     |
| 13                                        | <b>if LIFR.LIF is bound and gp130.LIF is not bound and LIFR.OSM is not bound and gp130.OSM is not bound and LIFR is not dimer and gp130.typeI is not dimer and gp130.typeII is not dimer then LIFR dimerizes with gp130 on typeI</b>                                                       | 11    | 4   |
| 14                                        | <b>if LIFR.LIF is bound and gp130.LIF is not bound and LIFR.OSM is not bound and gp130.OSM is not bound and LIFR is dimer and gp130.typeI is dimer and gp130.typeII is not dimer and LIFR.Y981 is not phospho and gp130.Y767 is not phospho then LIFR dedimerizes from gp130 on typeI</b>  | 12    |     |
| OSM pathway → type I receptor gp130:LIFR  |                                                                                                                                                                                                                                                                                            |       |     |
| 15                                        | <b>if gp130.OSM is bound and LIFR.OSM is not bound and gp130.LIF is not bound and LIFR.LIF is not bound and LIFR is not dimer and gp130.typeI is not dimer and gp130.typeII is not dimer then LIFR dimerizes with gp130 on typeI</b>                                                       | 11    | 6   |
| 16                                        | <b>if gp130.OSM is bound and LIFR.OSM is not bound and gp130.LIF is not bound and LIFR.LIF is not bound and LIFR is dimer and gp130.typeI is dimer and gp130.typeII is not dimer and LIFR.Y981 is not phospho and gp130.Y767 is not phospho then LIFR dedimerizes from gp130 on typeI</b>  | 12    |     |
| 17                                        | <b>if LIFR.OSM is bound and gp130.OSM is not bound and LIFR.LIF is not bound and gp130.LIF is not bound and LIFR is not dimer and gp130.typeI is not dimer and gp130.typeII is not dimer then LIFR dimerizes with gp130 on typeI</b>                                                       | 11    | 8   |
| 18                                        | <b>if LIFR.OSM is bound and gp130.OSM is not bound and LIFR.LIF is not bound and gp130.LIF is not bound and LIFR is dimer and gp130.typeI is dimer and gp130.typeII is not dimer and LIFR.Y981 is not phospho and gp130.Y767 is not phospho then LIFR dedimerizes from gp130 on typeI</b>  | 12    |     |
| OSM pathway → type II receptor gp130:OSMR |                                                                                                                                                                                                                                                                                            |       |     |
| 19                                        | <b>if gp130.OSM is bound and OSMR.OSM is not bound and gp130.LIF is not bound and OSMR.LIF is not bound and OSMR is not dimer and gp130.typeI is not dimer and gp130.typeII is not dimer then OSMR dimerizes with gp130 on typeII</b>                                                      | 11    | 6   |
| 20                                        | <b>if gp130.OSM is bound and OSMR.OSM is not bound and gp130.LIF is not bound and OSMR.LIF is not bound and OSMR is dimer and gp130.typeI is not dimer and gp130.typeII is dimer and OSMR.Y917 is not phospho and gp130.Y767 is not phospho then OSMR dedimerizes from gp130 on typeII</b> | 12    |     |
| 21                                        | <b>if OSMR.OSM is bound and gp130.OSM is not bound and OSMR.LIF is not bound and gp130.LIF is not bound and OSMR is not dimer and gp130.typeI is not dimer and gp130.typeII is not dimer then OSMR dimerizes with gp130 on typeII</b>                                                      | 11    | 10  |
| 22                                        | <b>if OSMR.OSM is bound and gp130.OSM is not bound and OSMR.LIF is not bound and gp130.LIF is not bound and OSMR is dimer and gp130.typeI is not dimer and gp130.typeII is dimer and OSMR.Y917 is not phospho and gp130.Y767 is not phospho then OSMR dedimerizes from gp130 on typeII</b> | 12    |     |
