# Supplementary material for: Narrative-based computational modelling of the Gp130/JAK/STAT signalling pathway
Source: PubMed Central journal article supplement (PMC2678071; doi:10.1186/1752-0509-3-40), 2009-04-15
Supplement: 1752-0509-3-40-S6.pdf [file 1752-0509-3-40-S6.pdf]

| id                        | description                                                                                                                                                                                                                                                                     | react | alt |
|---------------------------|---------------------------------------------------------------------------------------------------------------------------------------------------------------------------------------------------------------------------------------------------------------------------------|-------|-----|
| Receptors phosphorylation |                                                                                                                                                                                                                                                                                 |       |     |
| 23                        | <b>if gp130.typeI is dimer and gp130 is not bound then gp130 phospho on Y767;Y814;Y905;Y915</b>                                                                                                                                                                                 | 13    |     |
| 24                        | <b>if gp130.typeI is dimer and gp130 is not bound then gp130 dephospho on Y767;Y814;Y905;Y915</b>                                                                                                                                                                               | 14    |     |
| 25                        | <b>if LIFR is dimer and LIFR is not bound then LIFR phospho on Y981;Y1001;Y1028</b>                                                                                                                                                                                             | 13    |     |
| 26                        | <b>if LIFR is dimer and LIFR is not bound then LIFR dephospho on Y981;Y1001;Y1028</b>                                                                                                                                                                                           | 14    |     |
| 27                        | <b>if gp130.typeII is dimer and gp130 is not bound then gp130 phospho on Y767;Y814;Y905;Y915</b>                                                                                                                                                                                | 13    |     |
| 28                        | <b>if gp130.typeII is dimer and gp130 is not bound then gp130 dephospho on Y767;Y814;Y905;Y915</b>                                                                                                                                                                              | 14    |     |
| 29                        | <b>if OSMR is dimer and OSMR is not bound then OSMR phospho on Y917;Y945</b>                                                                                                                                                                                                    | 13    |     |
| 30                        | <b>if OSMR is dimer and OSMR is not bound then OSMR dephospho on Y917;Y945</b>                                                                                                                                                                                                  | 14    |     |
| STAT3 binding             |                                                                                                                                                                                                                                                                                 |       |     |
| 31                        | <b>if gp130.Y767 is phospho and STAT3 is in 3 and STAT3 is not dimer and gp130 is not bound and gp130.SOCS3 is not bound and STAT3.gp130 is not bound and STAT3.LIFR is not bound and STAT3.OSMR is not bound and STAT3.Y705 is not phospho then gp130 binds STAT3 on gp130</b> | 15    |     |
| 32                        | <b>if LIFR.Y981 is phospho and STAT3 is in 3 and STAT3 is not dimer and LIFR is not bound and LIFR.SOCS3 is not bound and STAT3.LIFR is not bound and STAT3.gp130 is not bound and STAT3.OSMR is not bound and STAT3.Y705 is not phospho then LIFR binds STAT3 on LIFR</b>      | 15    |     |
| 33                        | <b>if OSMR.Y917 is phospho and STAT3 is in 3 and STAT3 is not dimer and OSMR is not bound and OSMR.SOCS3 is not bound and STAT3.OSMR is not bound and STAT3.gp130 is not bound and STAT3.LIFR is not bound and STAT3.Y705 is not phospho then OSMR binds STAT3 on OSMR</b>      | 15    |     |
| 34                        | <b>if gp130.Y767 is phospho and STAT3 is in 3 and STAT3 is not dimer and gp130 is bound and gp130.SOCS3 is not bound and STAT3.gp130 is bound and STAT3.LIFR is not bound and STAT3.OSMR is not bound and STAT3.Y705 is not phospho then gp130 unbinds STAT3 on gp130</b>       | 16    |     |
| 35                        | <b>if LIFR.Y981 is phospho and STAT3 is in 3 and STAT3 is not dimer and LIFR is bound and LIFR.SOCS3 is not bound and STAT3.LIFR is bound and STAT3.gp130 is not bound and STAT3.OSMR is not bound and STAT3.Y705 is not phospho then LIFR unbinds STAT3 on LIFR</b>            | 16    |     |
| 36                        | <b>if OSMR.Y917 is phospho and STAT3 is in 3 and STAT3 is not dimer and OSMR is bound and OSMR.SOCS3 is not bound and STAT3.OSMR is bound and STAT3.gp130 is not bound and STAT3.LIFR is not bound and STAT3.Y705 is not phospho then OSMR unbinds STAT3 on OSMR</b>            | 16    |     |
| STAT3 phosphorylation     |                                                                                                                                                                                                                                                                                 |       |     |
| 37                        | <b>if STAT3.gp130 is bound then STAT3 phosphorylates on Y705</b>                                                                                                                                                                                                                | 17    |     |
| 38                        | <b>if STAT3.LIFR is bound then STAT3 phosphorylates on Y705</b>                                                                                                                                                                                                                 | 17    |     |
| 39                        | <b>if STAT3.OSMR is bound then STAT3 phosphorylates on Y705</b>                                                                                                                                                                                                                 | 17    |     |
| 40                        | <b>if STAT3 is in 3 then STAT3 dephosphorylates on Y705</b>                                                                                                                                                                                                                     | 18    |     |
