# Supplementary material for: Narrative-based computational modelling of the Gp130/JAK/STAT signalling pathway
Source: PubMed Central journal article supplement (PMC2678071; doi:10.1186/1752-0509-3-40), 2009-04-15
Supplement: 1752-0509-3-40-S7.pdf [file 1752-0509-3-40-S7.pdf]

| id                                   | description                                                                                                                                                                                                                                                                  | react | alt |
|--------------------------------------|------------------------------------------------------------------------------------------------------------------------------------------------------------------------------------------------------------------------------------------------------------------------------|-------|-----|
| STAT3 unbinding and homodimerization |                                                                                                                                                                                                                                                                              |       |     |
| 41                                   | <b>if gp130.Y767 is phospho and STAT3 is in 3 and STAT3 is not dimer and gp130 is bound and gp130.SOCS3 is not bound and STAT3.gp130 is bound and STAT3.LIFR is not bound and STAT3.OSMR is not bound and STAT3.Y705 is phosphorylated then gp130 unbinds STAT3 on gp130</b> | 19    |     |
| 42                                   | <b>if LIFR.Y981 is phospho and STAT3 is in 3 and STAT3 is not dimer and LIFR is bound and LIFR.SOCS3 is not bound and STAT3.LIFR is bound and STAT3.gp130 is not bound and STAT3.OSMR is not bound and STAT3.Y705 is phosphorylated then LIFR unbinds STAT3 on LIFR</b>      | 19    |     |
| 43                                   | <b>if OSMR.Y917 is phospho and STAT3 is in 3 and STAT3 is not dimer and OSMR is bound and OSMR.SOCS3 is not bound and STAT3.OSMR is bound and STAT3.gp130 is not bound and STAT3.LIFR is not bound and STAT3.Y705 is phosphorylated then OSMR unbinds STAT3 on OSMR</b>      | 19    |     |
| 44                                   | <b>if STAT3.Y705 is phospho and STAT3 is not dimer and STAT3.gp130 is not bound and STAT3.LIFR is not bound and STAT3.OSMR is not bound then STAT3 homodimerizes</b>                                                                                                         | 20    |     |
| STAT3 shuttling                      |                                                                                                                                                                                                                                                                              |       |     |
| 45                                   | <b>if STAT3 is in 3 and STAT3 is dimer and STAT3.gp130 is not bound and STAT3.LIFR is not bound and STAT3.OSMR is not bound then STAT3 relocates to 4</b>                                                                                                                    | 21    |     |
| 46                                   | <b>if STAT3 is in 4 and STAT3 is dimer and STAT3.PIAS3 is not bound then STAT3 dephospho on Y705</b>                                                                                                                                                                         | 22    |     |
| 47                                   | <b>if STAT3 is in 4 and STAT3 is dimer and STAT3.Y705 is not phospho then STAT3 dehomodimerizes</b>                                                                                                                                                                          | 23    |     |
| 48                                   | <b>if STAT3 is in 4 and STAT3 is not dimer and STAT3.Y705 is not phospho then STAT3 relocates to 3</b>                                                                                                                                                                       | 24    |     |
