# Supplementary material for: Narrative-based computational modelling of the Gp130/JAK/STAT signalling pathway
Source: PubMed Central journal article supplement (PMC2678071; doi:10.1186/1752-0509-3-40), 2009-04-15
Supplement: 1752-0509-3-40-S8.pdf [file 1752-0509-3-40-S8.pdf]

| id                                          | description                                                                                                                                              | react | alt |
|---------------------------------------------|----------------------------------------------------------------------------------------------------------------------------------------------------------|-------|-----|
| SOCS3 synthesis, degradation and inhibition |                                                                                                                                                          |       |     |
| 49                                          | <b>if STAT3 is in 4 and STAT3 is dimer and STAT3.Y705 is phospho and STAT3.PIAS3 is not bound then STAT3 synthesises SOCS3</b>                           | 25    |     |
| 50                                          | <b>SOCS3 degrades</b>                                                                                                                                    | 30    |     |
| 51                                          | <b>if gp130.Y767 is phospho and gp130.SOCS3 is not bound and SOCS3 is not bound and gp130.STAT3 is not bound then SOCS3 binds gp130 on SOCS3</b>         | 26    |     |
| 52                                          | <b>if LIFR.Y981 is phospho and LIFR.SOCS3 is not bound and SOCS3 is not bound and LIFR.STAT3 is not bound then SOCS3 binds LIFR on SOCS3</b>             | 26    |     |
| 53                                          | <b>if OSMR.Y917 is phospho and OSMR.SOCS3 is not bound and SOCS3 is not bound and OSMR.STAT3 is not bound then SOCS3 binds OSMR on SOCS3</b>             | 26    |     |
| 54                                          | <b>if gp130.Y767 is phospho and gp130.SOCS3 is bound and SOCS3 is bound and gp130.STAT3 is not bound then SOCS3 unbinds gp130 on SOCS3</b>               | 27    |     |
| 55                                          | <b>if LIFR.Y981 is phospho and LIFR.SOCS3 is bound and SOCS3 is bound and LIFR.STAT3 is not bound then SOCS3 unbinds LIFR on SOCS3</b>                   | 27    |     |
| 56                                          | <b>if OSMR.Y917 is phospho and OSMR.SOCS3 is bound and SOCS3 is bound and OSMR.STAT3 is not bound then SOCS3 unbinds OSMR on SOCS3</b>                   | 27    |     |
| PIAS3 inhibition                            |                                                                                                                                                          |       |     |
| 57                                          | <b>if STAT3 is in 4 and STAT3 is dimer and STAT3.Y705 is phospho and STAT3.PIAS3 is not bound and PIAS3 is not bound then PIAS3 binds STAT3 on PIAS3</b> | 28    |     |
| 58                                          | <b>if STAT3 is in 4 and STAT3 is dimer and STAT3.Y705 is phospho and STAT3.PIAS3 is bound and PIAS3 is bound then PIAS3 unbinds STAT3 on PIAS3</b>       | 29    |     |
