# Supplementary material for: Narrative-based computational modelling of the Gp130/JAK/STAT signalling pathway
Source: PubMed Central journal article supplement (PMC2678071; doi:10.1186/1752-0509-3-40), 2009-04-15

**A**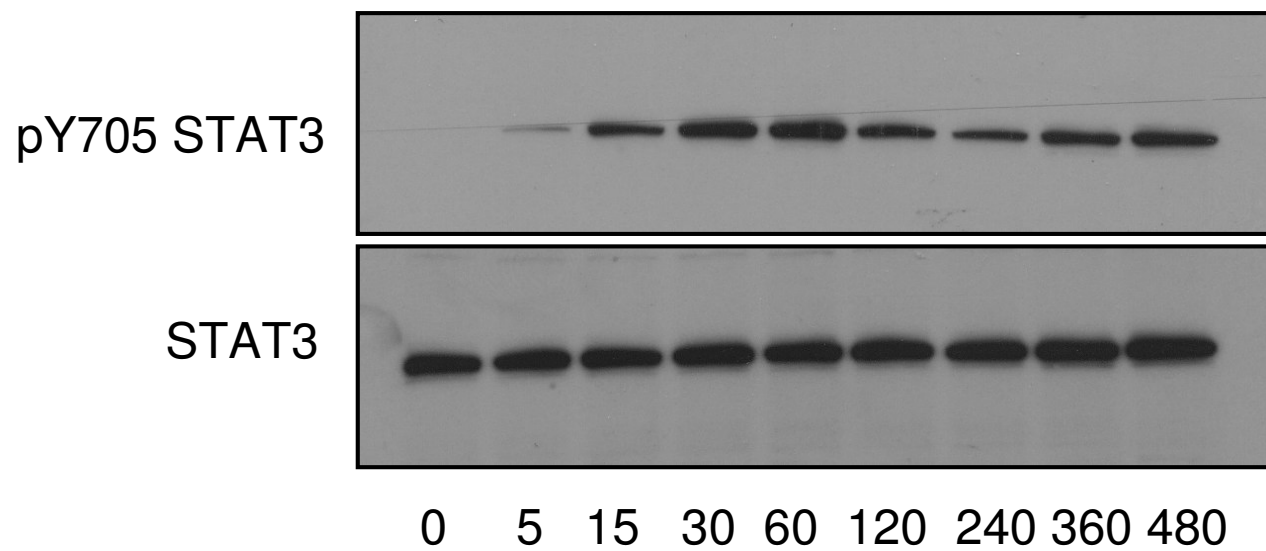**B**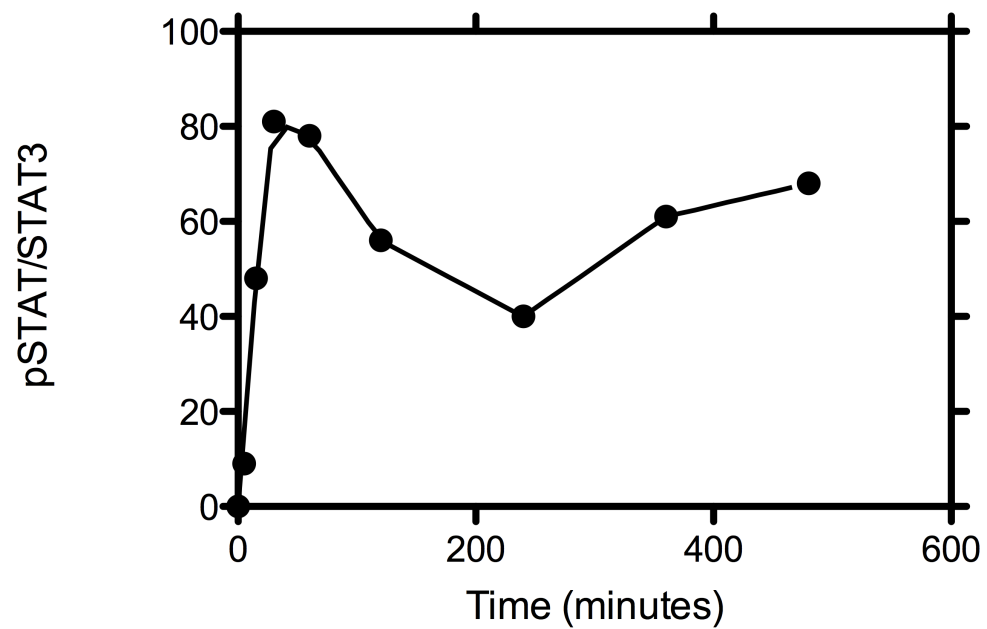**C**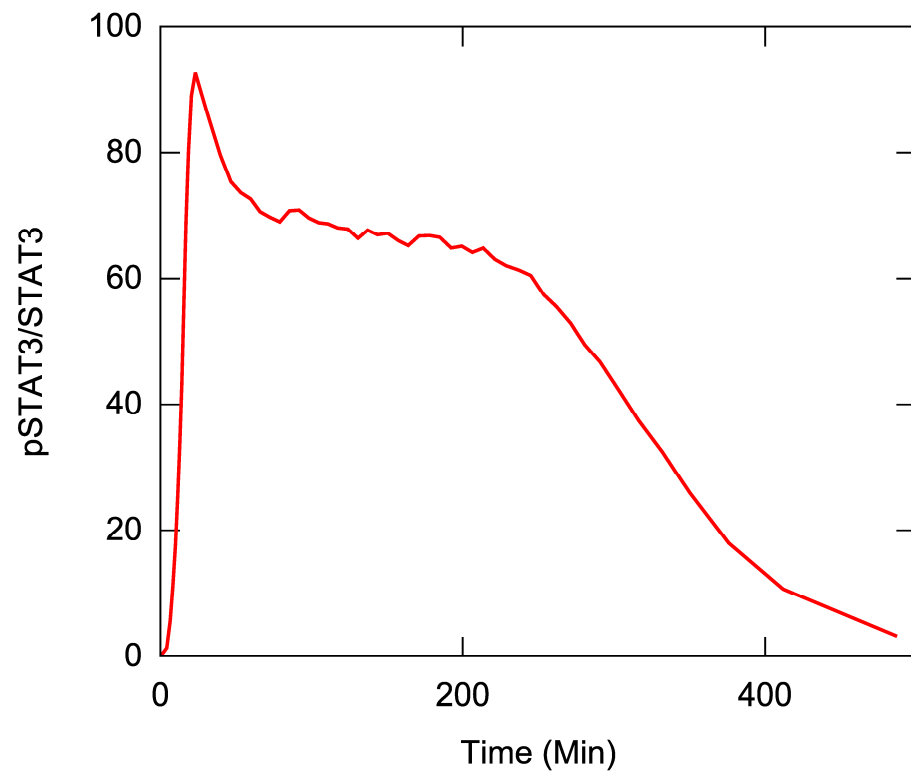

Supplement: 1752-0509-3-40-S9.pdf [file 1752-0509-3-40-S9.pdf]
